# Supplementary material for: Time-resolved structure-function coupling in brain networks
Source: PubMed Central journal article supplement (PMC9163085; doi:10.1038/s42003-022-03466-x), 2022-06-02
Supplement: 42003_2022_3466_MOESM2_ESM.pdf [file 42003_2022_3466_MOESM2_ESM.pdf]

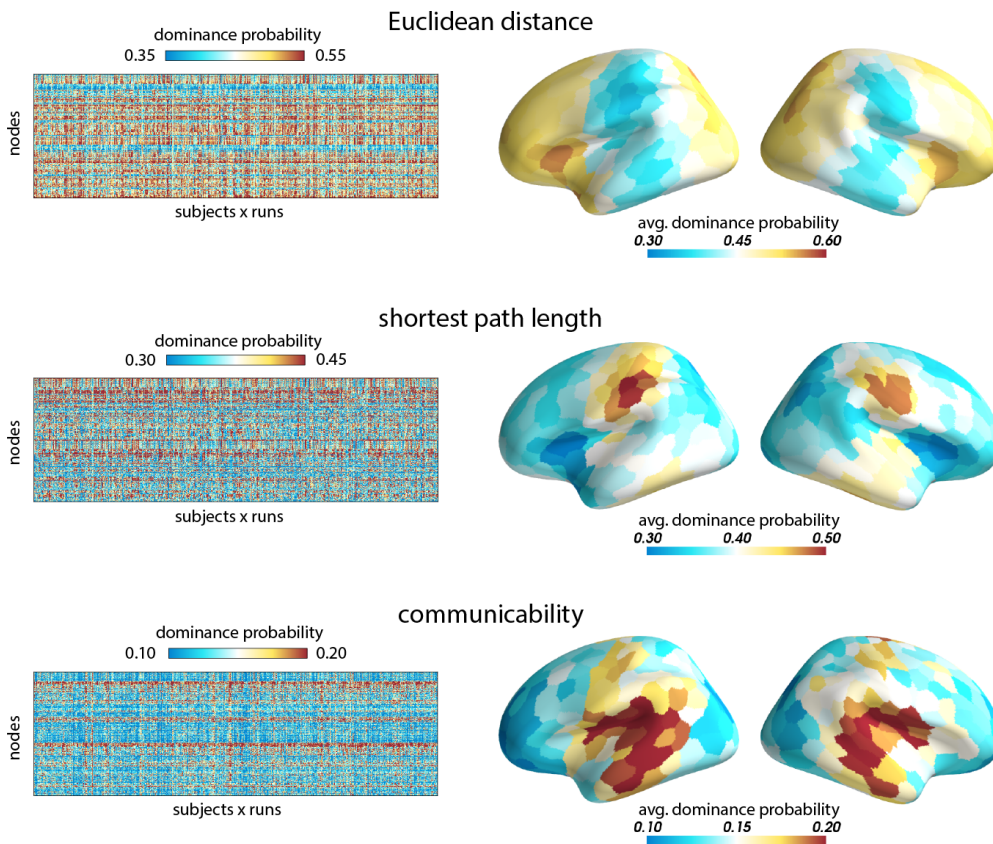

Figure S1 | **Predictor contributions.** Dominance Analysis was used to quantify the distinct contributions of the three predictors in the multilinear model (Euclidean distance, path length and communicability) [6, 13] (<https://github.com/dominance-analysis/dominance-analysis>). The technique estimates the relative importance of predictors by constructing all possible combinations of predictors and quantifying the relative contribution of each predictor as additional variance explained (i.e. gain in  $R^2$ ) by adding that predictor to the models. The incremental  $R^2$  contribution of each predictor to a given subset model of all the other predictors is then calculated as the increase in  $R^2$  due to the addition of that predictor to the regression model. Left: dominance over time for the three predictors. Each column in the matrix shows the frequency of the predictor being the dominant predictor through time. Right: brain map of the matrix averaged over subjects and runs.

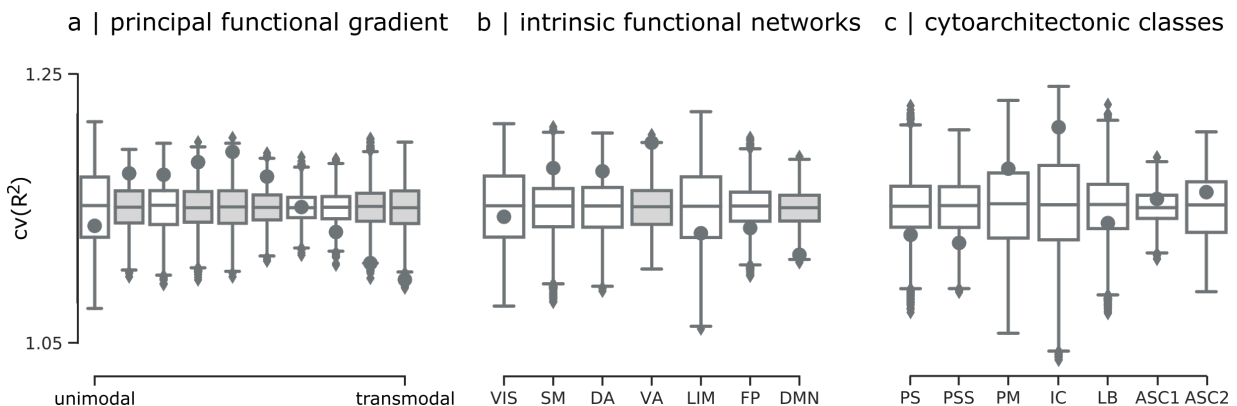

Figure S2 | **Spin test of the coefficient of variation of the structure-function coupling.** Black points show partition-specific mean  $cv(R^2)$  (same as results in Fig. 3c-e). Boxplots show distributions of partition-specific mean  $cv(R^2)$  for 10,000 spatial autocorrelation-preserving null models ("spin tests") [1, 53]. Darker (filled) and lighter (non-filled) boxes show partitions for which  $cv(R^2)$  is statistically significant ( $p < 0.05$ ) and non-significant ( $p > 0.05$ ), respectively.

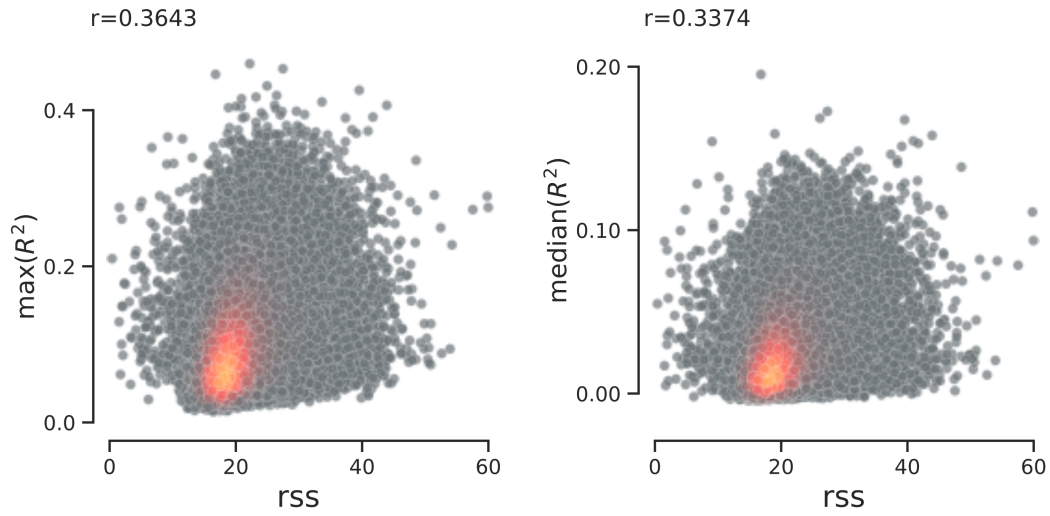

Figure S3 | **Co-fluctuation amplitude and structure-function coupling** To characterize the amplitude of the co-fluctuation time series, Esfahlani et al. calculated the root sum square (RSS) of the co-fluctuation time series across the network at each time point. The maximum and median of each of the  $R_t^2$  vectors (column vector at figure 1c) is positively correlated with the RSS.
